# Supplementary material for: Co-Detection of miR-21 and TNF-α mRNA in Budding Cancer Cells in Colorectal Cancer
Source: PubMed Central journal article supplement (PMC6515373; doi:10.3390/ijms20081907), 2019-04-17
Supplement: ijms-20-01907-s001.pdf [file ijms-20-01907-s001.pdf]

## Cryo-B

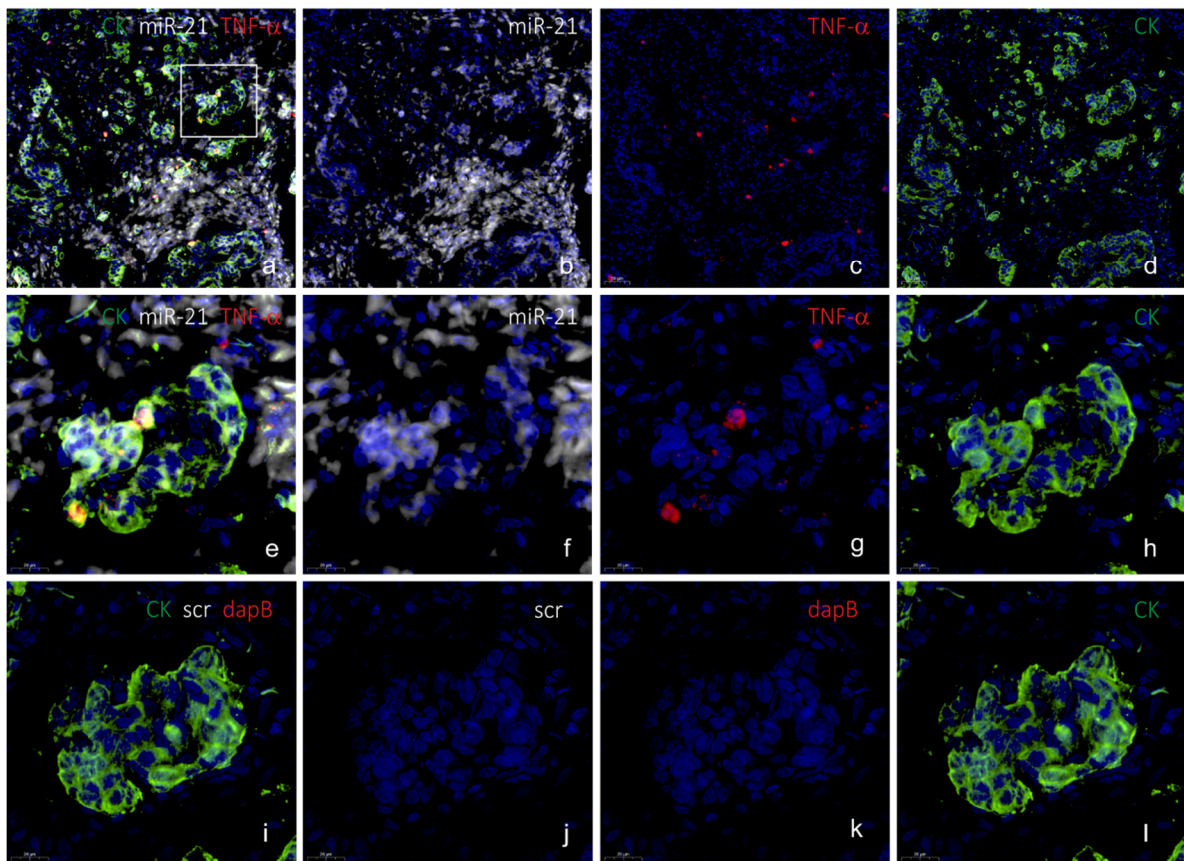

## Cryo-C

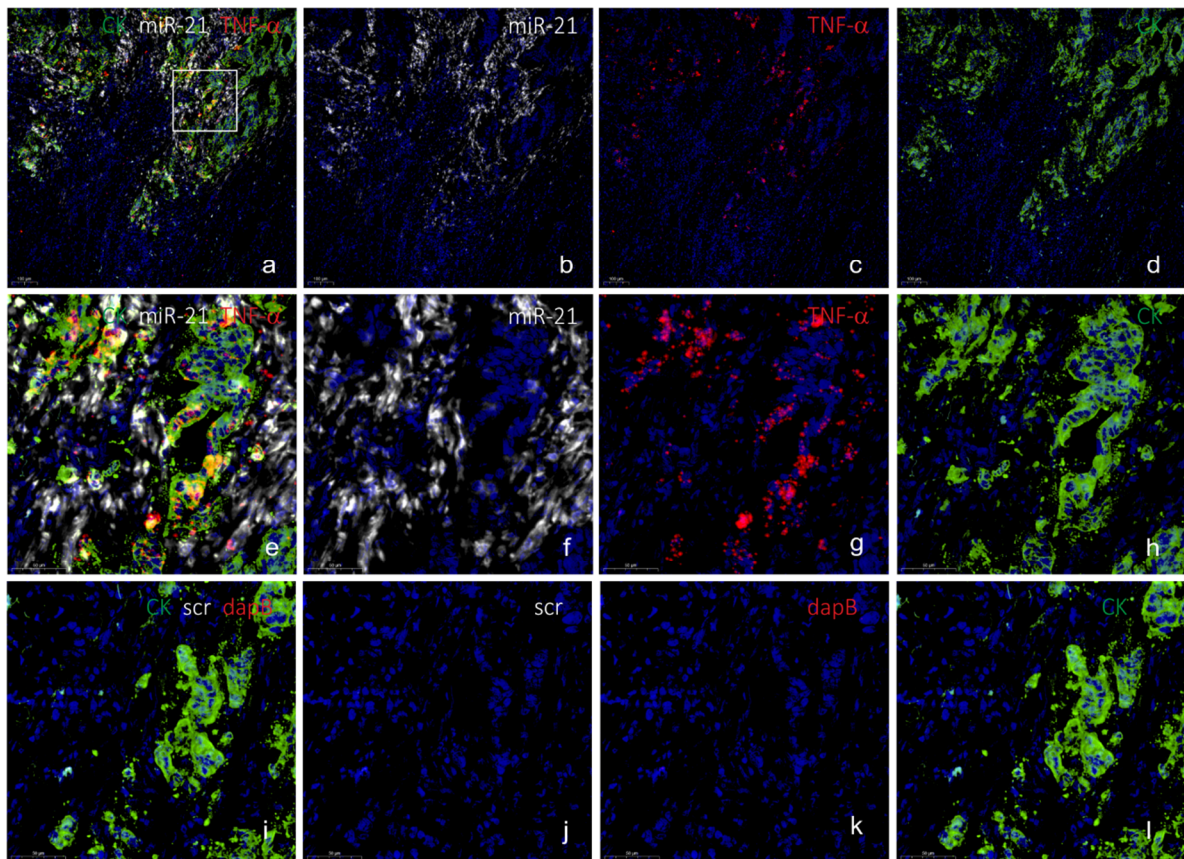

## Cryo-D

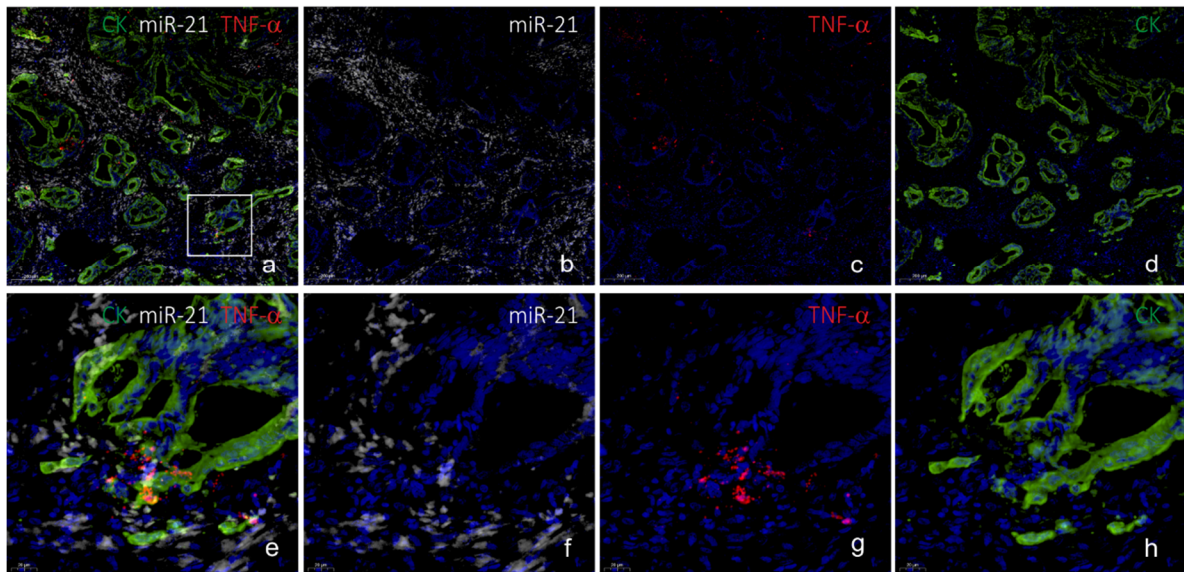

**Figure S1.** Confocal slide scanning of sections submitted to automated combined staining of miR-21, TNF- $\alpha$  mRNA and CK. The three panels in this supplementary figure show miR-21 and TNF- $\alpha$  mRNA expression in 3 different colorectal cancer cases with varying invasion patterns (cases cryo-B, cryo-C and cryo-D, Table 1). Examples are shown at low (a–d) and high (e–h) magnification, and in a, the framed area is depicted in e–h. In example cryo-B, TNF- $\alpha$  mRNA is seen in foci of cancer cells also positive for miR-21. In example cryo-C, TNF- $\alpha$  mRNA is prevalent and seen in multiple cancer cells that are generally weakly stained for miR-21 or miR-21 negative, whereas miR-21 is prevalent in the stromal cells. In example cryo-D, miR-21 is seen in a few TNF- $\alpha$  mRNA expressing branching cancer cells. For Cryo-B and Cryo-C, in a serial tissue section, the miR-21 probe was replaced with an LNA scramble probe, and the TNF- $\alpha$  mRNA probe was replaced with the dapB mRNA RNAscope probe, that both show virtually no staining (magnification in e–h is identical to i–l).
